# Supplementary material for: A piezoelectric quantum spin Hall insulator with Rashba spin splitting in Janus monolayer SrAlGaSe4
Source: Royal Society of Chemistry journal article supplement (doi:10.1039/d1tc01165k), 2021-01-01
Supplement: d1tc01165k1.pdf [file d1tc01165k1.pdf]

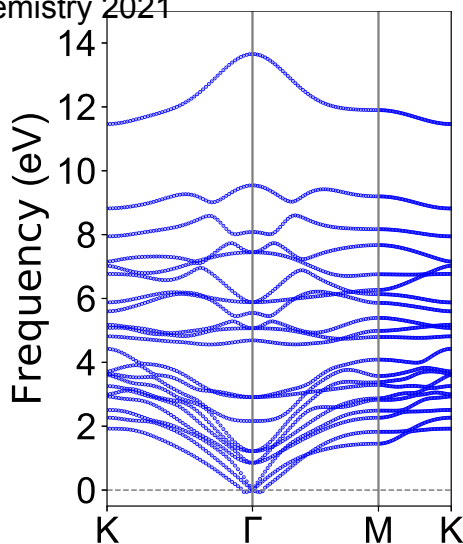

FIG. 1. (Color online) The phonon band dispersions of CaAlGaSe<sub>4</sub> monolayer by using GGA.

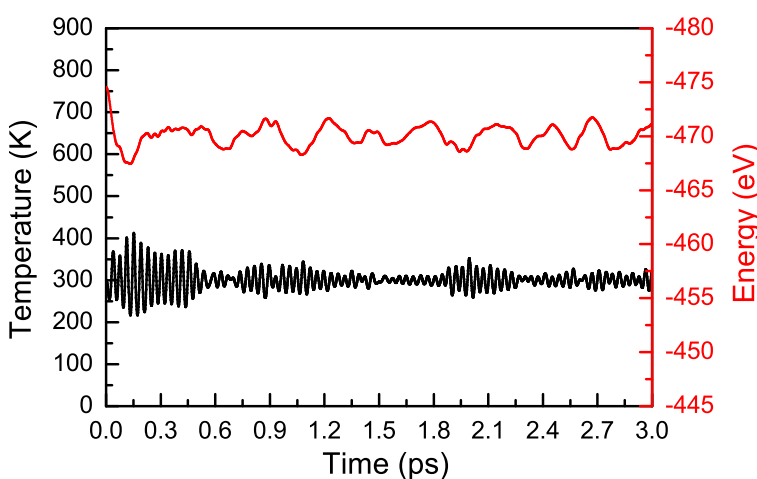

FIG. 2. (Color online) The temperature and total energy fluctuations of CaAlGaSe<sub>4</sub> monolayer at 300 K.

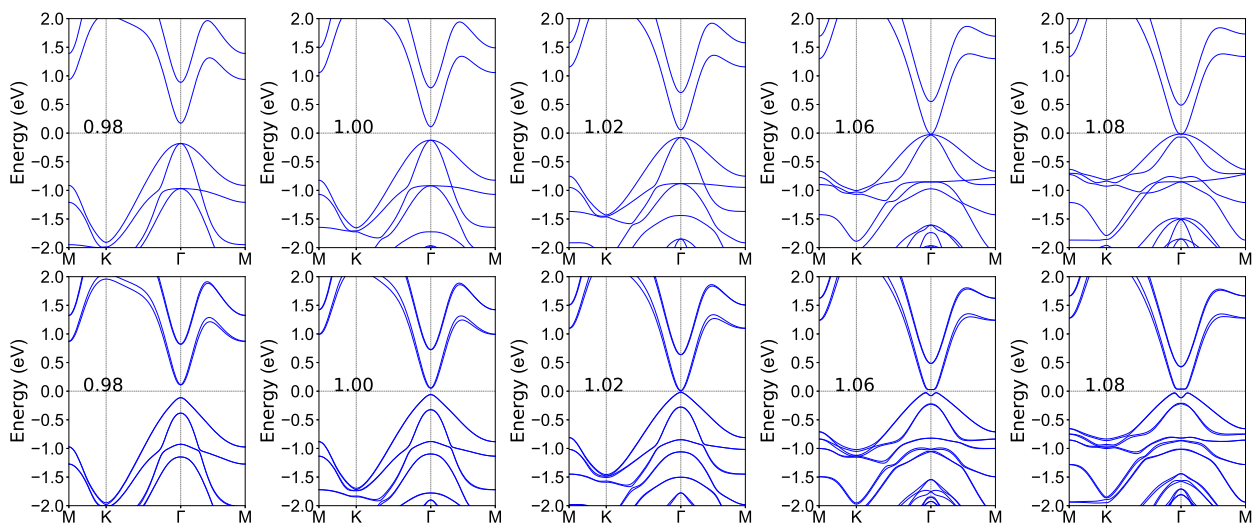

FIG. 3. (Color online) The energy band structures of CaAlGaSe<sub>4</sub> monolayer using GGA (Top) and GGA+SOC (Bottom) at representative 0.98, 1.00, 1.02, 1.06 and 1.08 strains.

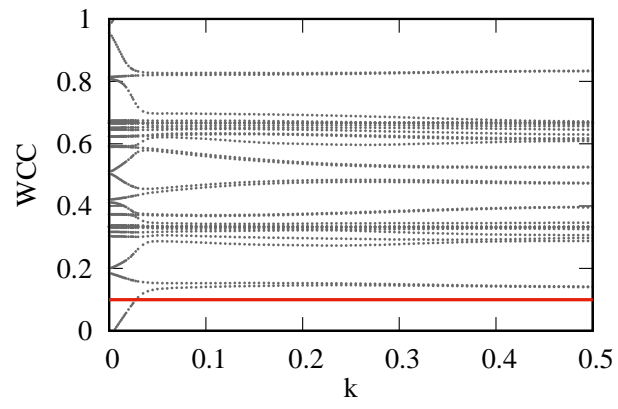

FIG. 4. (Color online) Evolution of WCC of  $\text{CaAlGaSe}_4$  monolayer at 1.06 strain.

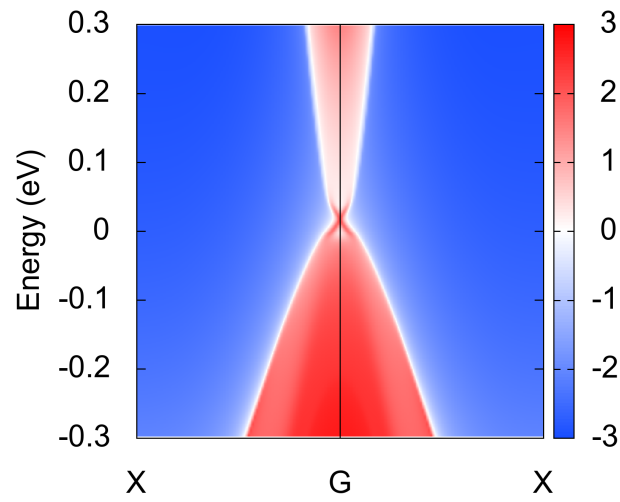

FIG. 5. (Color online) The edge states of semi-infinite  $\text{CaAlGaSe}_4$  under 1.06 strain.
